# Supplementary material
Source: publisher site journal article supplement (https://www.dovepress.com/article/410917)
Supplement: Supplementary file 1 [file get_supplementary_file.php]

**Supporting information**


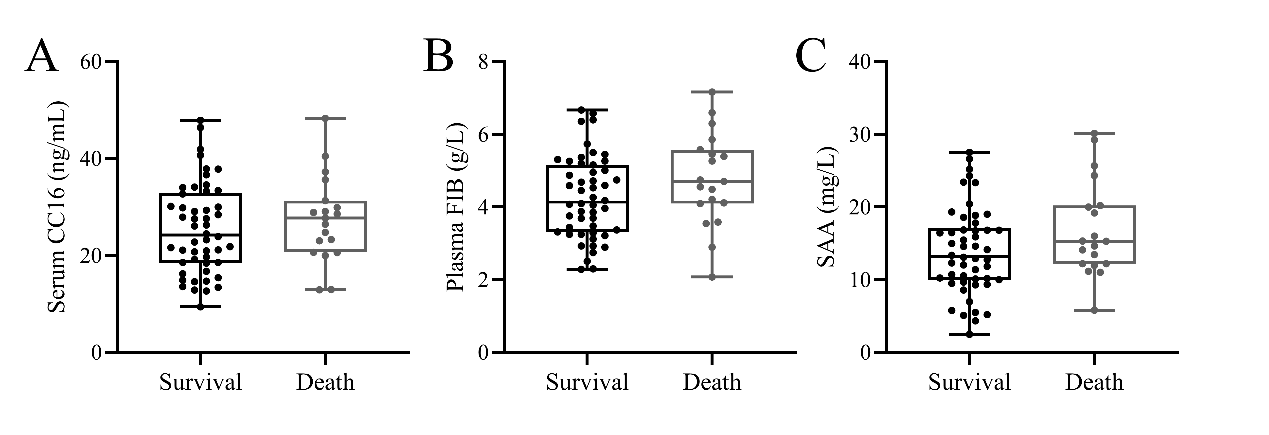


**Figure S1.** Comparisons of serum CC16 (A), plasma FIB (B) and SAA (C) at admission between survival (n = 50) and dead (n = 19) patients in AECOPD patients with poor prognosis in one year follow-up. There was no significance between the two groups.
